# Supplementary material for: A review of Norwegian Gymnometriocnemus (Diptera, Chironomidae) including the description of two new species and a new name for Gymnometriocnemus volitans (Goetghebuer) sensu Brundin
Source: Zookeys. 2015 Jun 17;(508):127–42. doi: 10.3897/zookeys.508.9874 (PMC4492210; doi:10.3897/zookeys.508.9874)
Supplement: Supplementary material 1 — Examined and DNA barcoded Gymnometriocnemus species from Norway [file zookeys-508-127-s001.xls]

## Sheet: Voucher info
Supplementary file 1. Examined and DNA barcoded Gymnometriocnemus specimens from Norway. Catalog # refers to number in the insect collection of the NTNU University Museum.
Sample ID	Catalog #	Status	Species Name	Gender	County	Municipality	Site	Latitude	Longitude	Elev.	Coll. Date	Collectors	Accession
SOE315	124545		Gymnometriocnemus	Female	Sør-Trøndelag	Røros	Sølendet	62.69	11.841	754	11-Jun-2006	T. Ekrem, E. Stur	HQ105054
CH-OSF107	143626		G. (G.) subnudus	Male	Oslo	Oslo	S Nordstrand, Liadalen	59.8481	10.7927	20	02-Jun-2010	G.Søli & M.Steinert	no sequence
CH-OSF106	143625		G. (G.) subnudus	Male	Oslo	Oslo	S Nordstrand, Liadalen	59.8481	10.7927	20	02-Jun-2010	G.Søli & M.Steinert	no sequence
Finnmark06	136105		G. (G.) marionensis	Male	Finnmark	Alta	Gargiaelven, Gargia fjellstue	69.8053	23.4894	120	11-Jun-2010	T. Ekrem, E. Stur	HQ941590
CH-eik64	143773	Paratype	G. (G.) pallidus	Male	Hordaland	Kvam	Berge	60.314	6.167	-	21-Jun-2011	K.H. Thunes	KP050319
CH-OSF168	143687	Paratype	G. (G.) pallidus	Male	Telemark	Porsgrunn	Brevik, Frierflauene	59.0579	9.66485	92	27-Jul-2010	G.Søli	JN275385
CH-eik47	143756	Paratype	G. (G.) pallidus	Female	Vestfold	Larvik	Skjærsjø	59.201	9.92	-	05-Jul-2012	K.H. Thunes	KP050304
CH-OSF167	143686	Paratype	G. (G.) pallidus	Male	Telemark	Porsgrunn	Brevik, Frierflauene	59.0579	9.66485	92	27-Jul-2010	G.Søli	JN275384
CH-eik131	143840	Holotype	G. (G.) pallidus	Male	Hordaland	Kvam	Berge	60.309	6.165	-	23-Jun-2011	K.H. Thunes	KP050307
CH-eik63	143772	Paratype	G. (G.) pallidus	Male	Hordaland	Kvam	Berge	60.314	6.167	-	21-Jun-2011	K.H. Thunes	KP050310
ATNA398	148113		G. (G.) subnudus	Male	Oppland	Dovre	Skranglehaugen	61.9827	9.8036	1110	21-Jul-2008	T. Ekrem	HM421493
CH-OSF123	143642		G. (G.) subnudus	Male	Oslo	Oslo	S Nordstrand, Liadalen	59.8481	10.7927	20	19-May-2010	G.Søli & M.Steinert	JN275356
CH-OSF88	143607		G. (G.) subnudus	Male	Telemark	Porsgrunn	Brevik, Dammane	59.0575	9.66882	75	30-Jun-2010	G.Søli	KP050315
ATNA280	148112		G. (G.) subnudus	Male	Oppland	Dovre	Skranglehaugen	61.9835	9.80384	1050	14-Jul-2008	T. Hoffstad	HM421388
CH-OSF135	143654		G. (G.) subnudus	Male	Oslo	Oslo	S Nordstrand, Liadalen	59.8481	10.7927	20	19-May-2010	G.Søli & M.Steinert	JN275367
Finnmark201	136299	Holotype	G. (R.) autumnalis	Male	Finnmark	Porsanger	small pond nr. Gaggavann	69.8306	25.1856	107	03-Sep-2010	A. Anderson	JF870848
Finnmark563	136658	Paratype	G. (R.) autumnalis	Male	Finnmark	Vardø	Nedre Domen	70.3215	31.0341	120	05-Sep-2010	A. Anderson	JF870926
Finnmark282	136378	Paratype	G. (R.) autumnalis	Male	Finnmark	Nordkapp	Nordkapp-plataeu	71.1446	25.7641	220	01-Sep-2010	T. Andersen	KP050312
ATNA481	148114	Paratype	G. (R.) autumnalis	Male	Oppland	Dovre	Vidjedalsbekken (upper)	61.9717	9.83606	1280	15-Sep-2008	T. Hoffstad	HQ551476
NO31	148116		G. (R.) brumalis	Male	Sør-Trøndelag	Trondheim	Bymarka, Holstdammen	63.44	10.286	230	05-Jun-2006	M.W.Olsen	KP050317
Finnmark58	136157		G. (R.) brumalis	Male	Finnmark	Kautokeino	Lahpoluoppal, Nahpoljohka	69.2103	23.762	320	12-Jun-2010	T. Ekrem, E. Stur	HQ941635
CH-OSF31	143550		G. (R.) brumalis	Male	Oslo	Oslo	S Nordstrand, Ljanselva	59.8541	10.8183	85	19-May-2010	G.Søli & M.Steinert	KP050306
CH-OSF70	143589		G. (R.) brumalis	Male	Oslo	Oslo	S Nordstrand, Ljanselva	59.85	10.8	-	08-May-2010	G.Søli & M.Steinert	KP050311
CH-OSF14	143533		G. (R.) brumalis	Male	Oslo	Oslo	S Nordstrand, Ljanselva	59.85	10.8	-	27-Jun-2010	G.Søli & M.Steinert	KP050313
Finnmark484	136579		G. (R.) brumalis	Male	Finnmark	Porsanger	Stabbursdalen, Rohkosjavri	70.1724	24.9038	12	15-Jun-2010	T. Ekrem, E. Stur	JN275520
Finnmark324	136420		G. (R.) brumalis	Male	Finnmark	Tana	Vestertana, Kjørebekken	70.4259	27.8745	6	17-Jun-2010	T. Ekrem, E. Stur	JN275447
CH-OSF13	143532		G. (R.) brumalis	Male	Oslo	Oslo	S Nordstrand, Ljanselva	59.85	10.8	-	27-Jun-2010	G.Søli & M.Steinert	KP050314
SOE452	145259		G. (R.) brumalis	Male	Sør-Trøndelag	Røros	Sølendet	62.69	11.841	754	11-Jun-2006	T. Ekrem, E. Stur	HQ105055
Finnmark75	136174		G. (R.) brumalis	Male	Finnmark	Alta	Sørelvedalen, Storelva	70.0137	23.5547	39	13-Jun-2010	T. Ekrem, E. Stur	HQ941652
Finnmark76	136175		G. (R.) kamimegavirgus	Male	Finnmark	Alta	Sørelvedalen, Storelva	70.0137	23.5547	39	13-Jun-2010	T. Ekrem, E. Stur	HQ941653
TRD-CH55	148117		G. (R.) kamimegavirgus	Male	Sør-Trøndelag	Trondheim	Gjeddevatnet	63.3813	10.6099	-	06-Jun-2010	Jon K. Skei	KP050316
CH-OSF30	143549		G. (R.) kamimegavirgus	Male	Oslo	Oslo	S Nordstrand, Ljanselva	59.8541	10.8183	85	19-May-2010	G.Søli & M.Steinert	KP050320
ATNA269	148111		G. (R.) kamimegavirgus	Male	Oppland	Dovre	Skranglehaugen	61.9814	9.8048	1119	30-Jun-2008	T. Hoffstad	HM421378
ATNA267	148110		G. (R.) kamimegavirgus	Male	Oppland	Dovre	Skranglehaugen	61.9814	9.8048	1119	30-Jun-2008	T. Hoffstad	HM421376
CH-OSF32	143551		G. (R.) kamimegavirgus	Female	Oslo	Oslo	S Nordstrand, Ljanselva	59.8541	10.8183	85	19-May-2010	G.Søli & M.Steinert	KP050308
ATNA203	148109		G. (R.) kamimegavirgus	Male	Oppland	Dovre	Skranglehaugen	61.9819	9.80454	1117	30-Jun-2008	T. Hoffstad	HM421317
CH-OSF131	143650		G. (R.) kamimegavirgus	Male	Oslo	Oslo	S Nordstrand, Liadalen	59.8481	10.7927	20	19-May-2010	G.Søli & M.Steinert	JN275363
NO30	148115		G. (R.) kamimegavirgus	Male	Sør-Trøndelag	Trondheim	Bymarka, Holstdammen	63.44	10.286	230	05-Jun-2006	M.W.Olsen	KP050318
Finnmark04	136103		G. (R.) kamimegavirgus	Male	Finnmark	Alta	Gargiaelven, Gargia fjellstue	69.8053	23.4894	120	11-Jun-2010	T. Ekrem, E. Stur	HQ941588
SOE437	145245		G. (R.) kamimegavirgus	Male	Sør-Trøndelag	Røros	Sølendet	62.689	11.832	785	22-Jun-2006	O. Hanssen	HQ105056
Finnmark522	136617		G. (R.) kamimegavirgus	Male	Finnmark	Lebesby	lake near Njallavarri	70.4521	27.0101	62	17-Jun-2010	T. Ekrem, E. Stur	JN275542
CH-OSF29	143548		G. (R.) kamimegavirgus	Male	Oslo	Oslo	S Nordstrand, Ljanselva	59.8541	10.8183	85	19-May-2010	G.Søli & M.Steinert	KP050309
Finnmark370	136466		G. (R.) kamimegavirgus	Male	Finnmark	Porsanger	fen near Gaggavann	69.8237	25.2009	106	16-Jun-2010	T. Ekrem, E. Stur	JN275465
CH-OSF33	143552		G. brevitarsis	Female	Oslo	Oslo	S Nordstrand, Ljanselva	59.8541	10.8183	85	19-May-2010	G.Søli & M.Steinert	KP050305
SOE128	124339		G. brevitarsis	Female	Sør-Trøndelag	Røros	Sølendet	62.689	11.832	785	30-May-2007	O. Frengen	HQ105053
